# Supplementary material for: Adherence to Antihypertensive Medications and Stroke Risk: A Dose‐Response Meta‐Analysis
Source: PubMed Central journal article supplement — J Am Heart Assoc. 2017 Jul 25;6(7):e006371. doi: 10.1161/JAHA.117.006371 (PMC5586324; doi:10.1161/jaha.117.006371), 2017-07-25
Supplement: JAH3-6-e006371-s001.pdf [file JAH3-6-e006371-s001.pdf]

## **SUPPLEMENTAL MATERIAL**

**Data S1. Literature search terms:**

The following search terms used were in the Medline database:

(adherence [All Fields] OR medication adherence [Mesh] OR patient compliance [Mesh] OR persistence [All Fields])

AND (hypertension [Mesh] OR antihypertensive agents [Mesh] OR angiotensin-converting enzyme inhibitors [Mesh] OR calcium channel blockers [Mesh] OR angiotensin receptor antagonists [Mesh] OR adrenergic beta-antagonists [Mesh] OR diuretics [Mesh] OR antihypertensive medications [All Fields])

AND (stroke [Mesh] OR cerebrovascular disorders [Mesh] OR cardiovascular diseases [Mesh]).

The search strategy for the Embase database was similar to that used for the Medline database.

**Table S1** The data source and diseases classification in each included study

| First author (year of publication) | Data source                                                                                                                                                                                                                                                                        | Diseases classification |
|------------------------------------|------------------------------------------------------------------------------------------------------------------------------------------------------------------------------------------------------------------------------------------------------------------------------------|-------------------------|
| Yang 2016 <sup>1</sup>             | MarketScan Medicaid database from 11 geographically dispersed states in the USA                                                                                                                                                                                                    | ICD-9                   |
| Kim 2016 <sup>2</sup>              | Korea National Health Insurance program in Korea                                                                                                                                                                                                                                   | ICD-10                  |
| Herttua 2016 <sup>3</sup>          | The Statistics Finland Labor Market database;<br>National Death Register in Finland;<br>National Drug Reimbursement Register in Finland;<br>the Drug Prescription Register by the Social Insurance Institution of Finland;<br>National Institute for Health and Welfare in Finland | ICD-10                  |
| Krousel-Wood 2015 <sup>4</sup>     | The Cohort Study of Medication Adherence in Older Adults (CoSMO) in the southeastern Louisiana, USA                                                                                                                                                                                | ICD-9                   |
| Gosmanova 2015 <sup>5</sup>        | Racial and Cardiovascular Risk Anomalies in CKD (RCAV) study examining risk factors of incident CKD in USA veterans                                                                                                                                                                | ICD-9                   |
| Xu 2013 <sup>6</sup>               | The China National Stroke Registry database                                                                                                                                                                                                                                        | Self-reported           |
| Wong 2013 <sup>7</sup>             | A territorywide database in Hong Kong                                                                                                                                                                                                                                              | ICD-9                   |
| Shin 2013 <sup>8</sup>             | Korean National Health Insurance Claims Database                                                                                                                                                                                                                                   | ICD-10                  |
| Herttua 2013 <sup>9</sup>          | The Statistics Finland Labor Market database;<br>National Drug Reimbursement Register in Finland;<br>the Drug Prescription Register by the Social Insurance Institution of Finland;<br>National Institute for Health and Welfare in Finland                                        | ICD-10                  |
| Perreault 2012 <sup>10</sup>       | A linked administrative health database from the RAMQ (Régie Assurance Maladie Québec) in                                                                                                                                                                                          | ICD-9                   |

|                                         |                                                                                                                                        |               |
|-----------------------------------------|----------------------------------------------------------------------------------------------------------------------------------------|---------------|
|                                         | Quebec, Canada                                                                                                                         |               |
| Degli 2011 <sup>11</sup>                | Medications Prescription Database maintained by the Local Health Unit of Florence, Italy                                               | ICD-9         |
| Corrao 2011 <sup>12</sup>               | The health service databases of Lombardy in Italy                                                                                      | Self-reported |
| Khan 2010 <sup>13</sup>                 | The Registry of the Canadian Stroke Network                                                                                            | Self-reported |
| Bailey 2010 <sup>14</sup>               | Tennessee's Medicaid program in USA                                                                                                    | ICD-9         |
| Mazzaglia 2009 <sup>15</sup>            | The Health Search/Thales Database in Italy                                                                                             | ICD-9         |
| Liu 2009 <sup>16</sup>                  | NHI Research Database in Taiwan                                                                                                        | ICD-9         |
| Kettani 2009 <sup>17</sup>              | A linked administrative health database from the RAMQ (Régie Assurance Maladie Québec) in Quebec, Canada; Med-Echo databases in Canada | ICD-9         |
| Breekveldt-Postma<br>2008 <sup>18</sup> | PHARMO Record Linkage System in Netherlands                                                                                            | ATC codes     |

---

ICD, International Classification of Diseases; CKD, chronic kidney disease; ATC, Anatomical Therapeutic Chemical.

**Table S2** The confounders adjusted for the multivariate analysis in each included study.

| First author (year of publication) | Adjustment for confounders                                                                                                                                                                                                                                                                                                         |
|------------------------------------|------------------------------------------------------------------------------------------------------------------------------------------------------------------------------------------------------------------------------------------------------------------------------------------------------------------------------------|
| Yang 2016 <sup>1</sup>             | Age, sex, race, previous CVD, and comorbidities (dyslipidemia, diabetes, chronic respiratory disease, chronic kidney disease, depression)                                                                                                                                                                                          |
| Kim 2016 <sup>2</sup>              | Age, sex, income, residential regions, comorbidities (diabetes, dyslipidemia, and CCI), and the number of AHM                                                                                                                                                                                                                      |
| Herttua 2016 <sup>3</sup>          | Age, sex, education, comorbidity (diabetes), and a history of cancer                                                                                                                                                                                                                                                               |
| Krousel-Wood 2015 <sup>4</sup>     | Age, sex, race, marital status, education, comorbidities (depressive symptoms and CCI), the number of AHM, BMI, and lifestyle behaviors                                                                                                                                                                                            |
| Gosmanova 2015 <sup>5</sup>        | Age, sex, race, marital status, income, public service, baseline glomerular filtration rate, BMI, SBP and DBP, and comorbidities (diabetes, CAD, PAD, chronic respiratory disease, dementia, liver disease, cancers, HIV/AIDS, and depression)                                                                                     |
| Xu 2013 <sup>6</sup>               | Age, education, income, marital status, a history of stroke, comorbidities (myocardial infarction, atrial fibrillation, and diabetes), AHM history, the class of AHM at discharge, severity of stroke, dysphagia, co-medication at discharge (antiplatelet agents, anticoagulants, lipid-lowering agents, and antidiabetic agents) |
| Wong 2013 <sup>7</sup>             | Age, sex, public service, and the class of first AHM                                                                                                                                                                                                                                                                               |
| Shin 2013 <sup>8</sup>             | Age, sex, type of health insurance, cardiovascular risk at baseline, comorbidities (diabetes, dyslipidemia, and CCI), and the number and class of AHM                                                                                                                                                                              |
| Herttua 2013 <sup>9</sup>          | Age, sex, length of AHM, education, income, comorbidity (diabetes), and a history of cancer                                                                                                                                                                                                                                        |
| Perreault 2012 <sup>10</sup>       | Age, sex, adherence to other medications (e.g. statins, antidiabetic agents, proton pump inhibitors, and antiresorptive agents for osteoporosis)                                                                                                                                                                                   |

|                                      |                                                                                                                                                                                                                                     |
|--------------------------------------|-------------------------------------------------------------------------------------------------------------------------------------------------------------------------------------------------------------------------------------|
| Degli 2011 <sup>11</sup>             | Age, sex, comorbidities (diabetes, dyslipidemia, heart disease, and atherosclerotic disease), and use of antidiabetic agents, lipid-lowering agents, cardiac therapy, and antiplatelet agents                                       |
| Corrao 2011 <sup>12</sup>            | Sex, age, the number of AHM, comorbidity (CCI), and drugs prescribed for heart failure or coronary heart disease                                                                                                                    |
| Khan 2010 <sup>13</sup>              | Age, AHM history, comorbidities (depression and other conditions), total number of baseline drugs used, socioeconomic status, and severity and type of previous stroke                                                              |
| Bailey 2010 <sup>14</sup>            | Age, sex, race, income, residential regions, type of health insurance, comorbidities (obesity, diabetes, dyslipidemia, CHF, myocardial infarction, atrial fibrillation, TIA, and CCI), history of substance abuse, the class of AHM |
| Mazzaglia 2009 <sup>15</sup>         | Age, sex, use of antithrombotics, $\geq 5$ concurrent medications, and comorbidities (diabetes, dyslipidemia, and PAD), prior hospitalization, and the number of AHM                                                                |
| Liu 2009 <sup>16</sup>               | Age, sex, the number of AHM, and comorbidities (diabetes, CAD, other heart, dyslipidemia, and renal diseases)                                                                                                                       |
| Kettani 2009 <sup>17</sup>           | Sex, public assistance, comorbidities (CAD, CHF, PAD, other CVD, diabetes, and dyslipidemia), antiplatelet agents, antidiabetic agents, and lipid-lowering agents                                                                   |
| Breekveldt-Postma 2008 <sup>18</sup> | Sex, age, type of prescriber, cardiovascular co-medication, initial AHM and number of AHM classes, and comorbidity (myocardial infarction)                                                                                          |

---

AHM, antihypertensive medication; CVD, cardiovascular disease; CCI, Charlson Comorbidity Index; BMI, body mass index; SBP, systolic blood pressure; DBP, diastolic blood pressure; HIV, human immunodeficiency virus; AIDS, acquired immune deficiency syndrome; CHF, congestive heart failure; PAD, peripheral artery diseases; CAD, coronary artery disease.



---

\*Newcastle-Ottawa Scale was used to assess the study quality in this meta-analysis. The full score was 9 stars, and the high-quality study was defined as a study with 8 awarded stars.

† A maximum of two stars could be awarded for this item. One star with adjustment for age and sex, two stars if there was additional comorbidity.



**Table S4** Sensitivity analysis for the main confounders\*

| Group                                          | No. of studies | RR   | 95% CI    | $I^2$ , % | PI    |
|------------------------------------------------|----------------|------|-----------|-----------|-------|
| Adjusted for the number of AHM                 |                |      |           |           | 0.188 |
| Yes                                            | 7              | 0.69 | 0.62-0.76 | 64.0      |       |
| No                                             | 11             | 0.76 | 0.68-0.84 | 86.4      |       |
| Adjusted for the class of AHM                  |                |      |           |           | 0.020 |
| Yes                                            | 5              | 0.82 | 0.74-0.91 | 83.0      |       |
| No                                             | 13             | 0.69 | 0.64-0.74 | 55.9      |       |
| Adjusted for other co-medications <sup>†</sup> |                |      |           |           |       |
| Yes                                            | 6              | 0.73 | 0.65-0.81 | 68.3      | 0.997 |
| No                                             | 12             | 0.72 | 0.65-0.81 | 87.9      |       |

AHM, antihypertensive medication; RR, relative risk; CI, confidence interval; PI, P interaction.

\* Pooled RRs and 95% CIs were estimated using a random-effects model.

<sup>†</sup>Other co-medications included antiplatelet agents, antidiabetic agents, lipid-lowering agents, and anticoagulants.

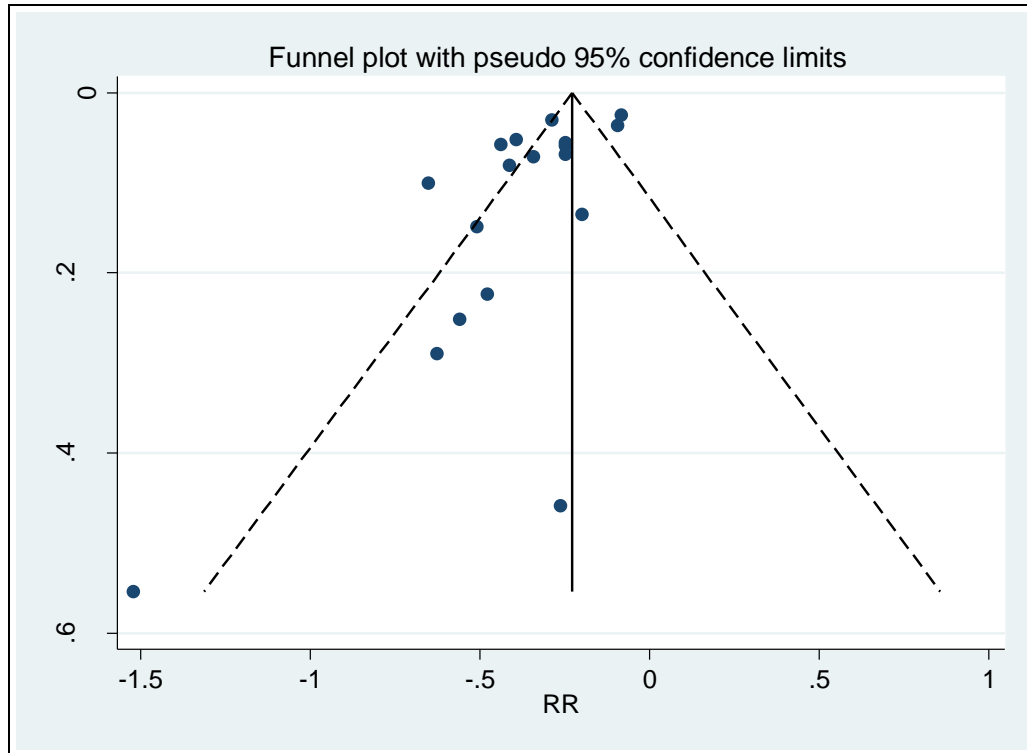

**Figure S1.** Funnel plot for publication bias test.

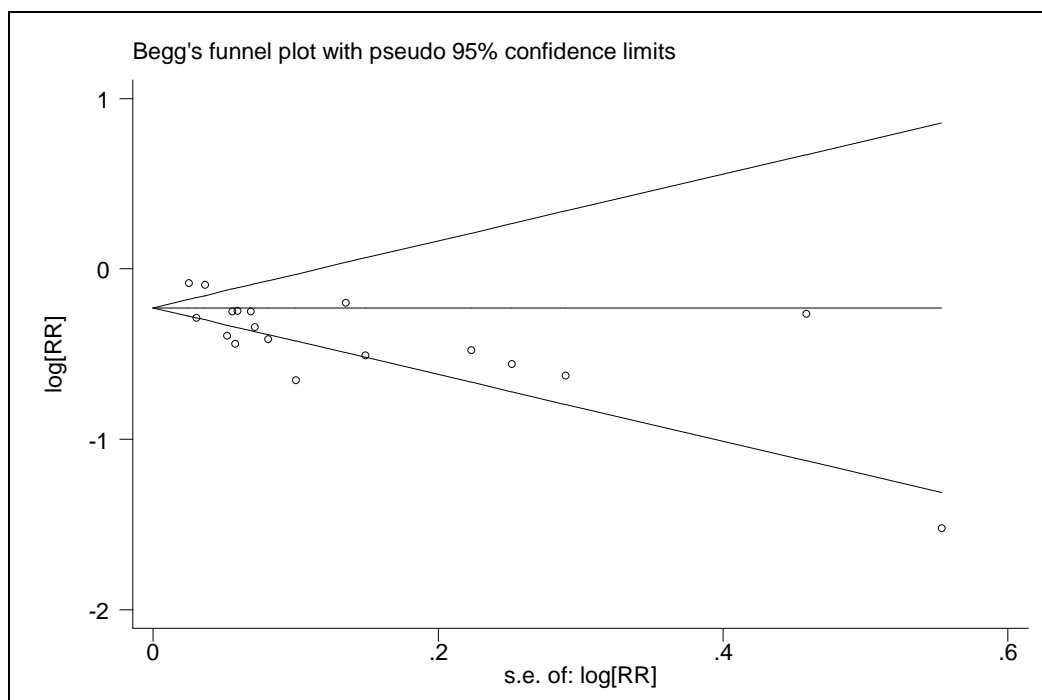

**Figure S2.** Publication bias test for the association between antihypertensive agents adherence and stroke risk. Begg's test,  $z = 0.680$  (continuity corrected);  $p > |z| = 0.495$  (continuity corrected).

## Supplemental References

1. Yang Z, Howard DH, Will J, Loustalot F, Ritchey M, Roy K. Association of antihypertensive medication adherence with healthcare use and medicaid expenditures for acute cardiovascular events. *Med Care*. 2016;54:504-511
2. Kim S, Shin DW, Yun JM, Hwang Y, Park SK, Ko YJ, Cho B. Medication adherence and the risk of cardiovascular mortality and hospitalization among patients with newly prescribed antihypertensive medications. *Hypertension*. 2016;67:506-512
3. Herttua K, Martikainen P, Batty GD, Kivimaki M. Poor adherence to statin and antihypertensive therapies as risk factors for fatal stroke. *J Am Coll Cardiol*. 2016;67:1507-1515
4. Krousel-Wood M, Holt E, Joyce C, Ruiz R, Dornelles A, Webber LS, Morisky DE, Frohlich ED, Re RN, He J, Whelton PK, Muntner P. Differences in cardiovascular disease risk when antihypertensive medication adherence is assessed by pharmacy fill versus self-report: The cohort study of medication adherence among older adults (cosmo). *J Hypertens*. 2015;33:412-420
5. Gosmanova EO, Molnar MZ, Alrifai A, Lu JL, Streja E, Cushman WC, Kalantar-Zadeh K, Kovesdy CP. Impact of non-adherence on renal and cardiovascular outcomes in us veterans. *Am J Nephrol*. 2015;42:151-157
6. Xu J, Zhao X, Wang Y, Wang C, Liu L, Sun B, Wang A, Wang Y. Impact of a better persistence with antihypertensive agents on ischemic stroke outcomes for secondary prevention. *PLoS One*. 2013;8:e65233
7. Wong MC, Tam WW, Cheung CS, Wang HH, Tong EL, Sek AC, Yan BP, Cheung NT, Leeder S, Yu CM, Griffiths S. Drug adherence and the incidence of coronary heart disease- and stroke-specific mortality among 218,047 patients newly prescribed an antihypertensive medication: A five-year cohort study. *Int J Cardiol*. 2013;168:928-933
8. Shin S, Song H, Oh SK, Choi KE, Kim H, Jang S. Effect of antihypertensive medication adherence on hospitalization for cardiovascular disease and mortality in hypertensive patients. *Hypertens Res*. 2013;36:1000-1005
9. Herttua K, Tabak AG, Martikainen P, Vahtera J, Kivimaki M. Adherence to antihypertensive therapy prior to the first presentation of stroke in hypertensive adults: Population-based study. *Eur Heart J*. 2013;34:2933-2939
10. Perreault S, Yu AY, Cote R, Dragomir A, White-Guay B, Dumas S. Adherence to antihypertensive agents after ischemic stroke and risk of cardiovascular outcomes. *Neurology*. 2012;79:2037-2043
11. Degli Esposti L, Saragoni S, Benemei S, Batacchi P, Geppetti P, Di Bari M, Marchionni N, Sturani A, Buda S, Degli Esposti E. Adherence to antihypertensive medications and health outcomes among newly treated hypertensive patients. *Clinicoecon Outcomes Res*. 2011;3:47-54
12. Corrao G, Parodi A, Nicotra F, Zambon A, Merlino L, Cesana G, Mancia G. Better compliance to antihypertensive medications reduces cardiovascular risk. *J Hypertens*. 2011;29:610-618
13. Khan NA, Yun L, Humphries K, Kapral M. Antihypertensive drug use and adherence after stroke: Are there sex differences? *Stroke*. 2010;41:1445-1449
14. Bailey JE, Wan JY, Tang J, Ghani MA, Cushman WC. Antihypertensive medication

- adherence, ambulatory visits, and risk of stroke and death. *J Gen Intern Med.* 2010;25:495-503
15. Mazzaglia G, Ambrosioni E, Alacqua M, Filippi A, Sessa E, Immordino V, Borghi C, Brignoli O, Caputi AP, Cricelli C, Mantovani LG. Adherence to antihypertensive medications and cardiovascular morbidity among newly diagnosed hypertensive patients. *Circulation.* 2009;120:1598-1605
  16. Liu PH, Hu FC, Wang JD. Differential risks of stroke in pharmacotherapy on uncomplicated hypertensive patients? *J Hypertens.* 2009;27:174-180
  17. Kettani FZ, Dragomir A, Cote R, Roy L, Berard A, Blais L, Lalonde L, Moreau P, Perreault S. Impact of a better adherence to antihypertensive agents on cerebrovascular disease for primary prevention. *Stroke.* 2009;40:213-220
  18. Breekveldt-Postma NS, Penning-van Beest FJ, Siiskonen SJ, Falvey H, Vincze G, Klungel OH, Herings RM. The effect of discontinuation of antihypertensives on the risk of acute myocardial infarction and stroke. *Curr Med Res Opin.* 2008;24:121-127
